# Supplementary material
Source: ML conference proceedings conference paper supplement (https://proceedings.neurips.cc/paper_files/paper/2020/hash/0163cceb20f5ca7b313419c068abd9dc-Abstract.html)
Supplement: Supplementary file [file 0163cceb20f5ca7b313419c068abd9dc-Supplemental.pdf]

## A Standard facts

**Fact A.1.**  $e^x \leq 1 + x + x^2$  for all  $x \in (-\infty, 1]$ .

**Claim A.2.** Suppose that  $x$  satisfies

$$x^2 - \alpha x - \beta \leq 0,$$

where  $\alpha, \beta \geq 0$  are constants. Then

$$x \leq \frac{\alpha + \sqrt{\alpha^2 + 4\beta}}{2}.$$

**Claim A.3.** Let  $f$  be a non-negative submodular function on  $[n]$  that is bounded above by 1. Let  $X_0, \dots, X_s$  be a monotone sequence of sets, i.e. either  $X_0 \subseteq \dots \subseteq X_s \subseteq [n]$  or  $[n] \supseteq X_0 \supseteq \dots \supseteq X_s$ . Then for any  $I \subseteq [s]$ ,

$$\sum_{i \in I} f(X_i) - f(X_{i-1}) \leq 1.$$

*Proof.* First, suppose that  $X_i$  are monotone increasing. Construct a sequence  $X'_i$  as follows. Set  $X'_0 = X_0$ . If  $i \notin I$  then set  $X'_i = X'_{i-1}$ . If  $i \in I$  then set  $X'_i = X'_{i-1} \cup (X_i \setminus X_{i-1})$ . In this case,

$$\sum_{i \in I} f(X_i) - f(X_{i-1}) \leq \sum_{i \in I} f(X'_i) - f(X'_{i-1}) = \sum_{i=1}^s f(X'_i) - f(X'_{i-1}) = f(X'_s) - f(X'_0) \leq 1.$$

For the monotone decreasing case, consider the submodular function  $g(X) = f([n] - X)$  and set  $Y_i = [n] - X_i$ . Observe that  $Y_i$  are monotone increasing sets. Then

$$\sum_{i \in I} f(X_i) - f(X_{i-1}) = \sum_{i \in I} g([n] - X_i) - g([n] - X_{i-1}) = \sum_{i \in I} g(Y_i) - g(Y_{i-1}) \leq 1,$$

where the last inequality is by the monotone increasing case.  $\square$

**Fact A.4.** Suppose that  $p \in [0, 1]^n$  satisfies  $\sum_i p_i = k$ . Let  $q = \frac{k}{n} \mathbf{1}$ . Then  $D_{\text{KL}}(p, q) \leq k \ln(n/k)$ .

*Proof.* We have  $D_{\text{KL}}(p, q) = \sum_i p_i \ln \frac{p_i}{k/n} = \sum_i p_i \ln(n/k) + \sum_i p_i \log p_i \leq k \ln(n/k)$ , where in the last inequality we used  $\sum_i p_i \ln p_i \leq 0$ .  $\square$

**Fact A.5.** Let  $\pi = \Pi_{\mathcal{X} \cap \mathcal{D}}^\Phi(y)$ . Then  $D_\Phi(x, \pi) \leq D_\Phi(x, y)$  for all  $x \in \mathcal{X} \cap \mathcal{D}$ .

**Proposition A.6.** Let  $u > 0$  and  $a_1, \dots, a_T \in [0, u]$ . Then

$$\sum_{t=1}^T \frac{a_t}{\sqrt{u + \sum_{i < t} a_i}} \leq 2 \sqrt{\sum_{t=1}^T a_t}.$$

*Proof.* This follows from [2, Lemma 3.5].  $\square$

## B Online Dual Averaging

Both of our algorithms make use of the online dual averaging algorithm, which we will briefly describe here (see Bubeck [4, Chapter 4] for a more detailed exposition). Let  $\mathcal{D} \subseteq \mathbb{R}^n$  be an open convex set and  $\Phi: \mathcal{D} \rightarrow \mathbb{R}$  be a strictly convex and differentiable function on  $\mathcal{D}$ . The function  $\Phi$  is called the *mirror map*. We further require that  $\nabla \Phi(\mathcal{D}) = \mathbb{R}^n$  and that  $\lim_{x \rightarrow \partial \mathcal{D}} \|\nabla \Phi(x)\| = +\infty$ . Let  $\mathcal{X}$  denote the feasible region, which is assumed to be closed and convex. Moreover,  $\mathcal{X} \subseteq \overline{\mathcal{D}}$  and  $\mathcal{X} \cap \mathcal{D} \neq \emptyset$ . Finally,  $D_\Phi(x, y) := \Phi(x) - \Phi(y) - \langle \nabla \Phi(y), x - y \rangle$  is the Bregman divergence of  $\Phi$ . We use the notation  $\Pi_{\mathcal{X} \cap \mathcal{D}}^\Phi(y) = \operatorname{argmin}_{x \in \mathcal{X} \cap \mathcal{D}} D_\Phi(x, y)$  to denote the Bregman projection of  $y$  onto  $\mathcal{X}$  with  $\Phi$  as the mirror map.

The gradient of the mirror map  $\nabla \Phi: \mathcal{D} \rightarrow \mathbb{R}^n$  and the gradient of its conjugate  $\nabla \Phi^*: \mathbb{R}^n \rightarrow \mathcal{D}$  are mutually inverse bijections between the primal space  $\mathcal{D}$  and the dual space  $\mathbb{R}^n$ . We will adopt the

following notational convention. Any vector in the primal space will be written without a hat, such as  $x \in \mathcal{D}$ . The same letter with a hat, namely  $\hat{x}$ , will denote the corresponding dual vector:

$$\hat{x} := \nabla\Phi(x) \quad \text{and} \quad x := \nabla\Phi^*(\hat{x}) \quad \text{for all letters } x.$$

In our applications, we take  $\mathcal{D} = \mathbb{R}_{>0}^n$  and  $\Phi(x) = \sum_i x_i \ln x_i$ . In Section 3, we take  $\mathcal{X}$  to be the matroid base polytope while in Section 4 we take  $\mathcal{X}$  to be the unit Euclidean ball intersected with the positive orthant. In this case,

$$\nabla\Phi(x)_i = \ln(x_i) + 1 \quad \text{and} \quad \nabla\Phi^*(\hat{x})_i = \exp(\hat{x}_i - 1) \quad (\text{B.1})$$

and the Bregman divergence is the generalized KL divergence, i.e.

$$D_\Phi(x, y) = D_{\text{KL}}(x, y) = \sum_{i=1}^n x_i \ln \frac{x_i}{y_i} - x_i + y_i.$$

We note that the assumptions required above on  $\mathcal{D}, \Phi, \mathcal{X}$  are satisfied with these choices. Algorithm 4 describes the online dual averaging algorithm. In the entirety of this section, we will always assume that  $f_t$  denote convex functions and that  $\|f_t\|_\infty \leq 1$  for all  $t$ .

---

#### Algorithm 4 Online Dual Averaging

---

**Input:** Initial point  $x_1 \in \mathcal{X} \cap \mathcal{D}$ , mirror map  $\Phi$ , and learning rate  $\eta : \mathbb{N} \rightarrow \mathbb{R}_{>0}$ .

- 1:  $\hat{x}_1 \leftarrow \nabla\Phi(x_1)$
  - 2: **for**  $t = 1, 2, \dots$ , **do**
  - 3:   Play  $x_t$ , incur cost  $f_t(x_t)$ , and receive subgradient  $\hat{g}_t \in \partial f_t(x_t)$ .
  - 4:    $\hat{y}_{t+1} \leftarrow \hat{x}_1 - \eta_{t+1} \sum_{i \leq t} \hat{g}_i$
  - 5:    $y_{t+1} \leftarrow \nabla\Phi^*(\hat{y}_{t+1})$
  - 6:    $x_{t+1} \leftarrow \Pi_{\mathcal{X} \cap \mathcal{D}}^\Phi(y_{t+1})$
- 

The following is a standard, but quite general, analysis of the online dual averaging algorithm.

**Theorem B.1.** *Assume that  $\eta_t \geq \eta_{t+1} > 0$  for all  $t \geq 1$ . Let  $\{x_t\}_{t \geq 1}$  be the sequence of iterates generated by Algorithm 4. Let  $v_t = \nabla\Phi^*(\hat{x}_t - \eta_t \hat{g}_t)$ . Then for any mirror map  $\Phi$ , any sequence of convex functions  $\{f_t\}_{t \geq 1}$  with each  $f_t : \mathcal{X} \rightarrow \mathbb{R}$ , and any  $z \in \mathcal{X}$ ,*

$$\sum_{t=1}^T (f_t(x_t) - f_t(z)) \leq \sum_{t=1}^T \frac{D_\Phi(x_t, v_t)}{\eta_t} + \frac{\sup_{u \in \mathcal{X}} D_\Phi(u, x_1)}{\eta_{T+1}} \quad \forall T > 0. \quad (\text{B.2})$$

If the cost functions are linear, say  $f_t(x) = c_t^\top x$ , and the mirror map is  $\Phi(x) = \sum_i x_i \ln x_i$  then we have the following bound on the regret.

**Corollary B.2.** *Assume that  $\eta_1 \leq 1$  and  $\eta_t \geq \eta_{t+1} > 0$  for all  $t \geq 1$ . Assume that  $\Phi(x) = \sum_i x_i \ln x_i$ . Let  $\{x_t\}_{t \geq 1}$  be the sequence of iterates generated by Algorithm 4. Then for any sequence of cost vectors  $c_t \in [-1, 1]^n$  and any  $z \in \mathcal{X}$ ,*

$$\sum_{t=1}^T (c_t^\top x_t - c_t^\top z) \leq \sum_{t=1}^T \eta_t |c_t|^\top x_t + \frac{\sup_{u \in \mathcal{X}} D_{\text{KL}}(u, x_1)}{\eta_{T+1}} \quad \forall T > 0.$$

**Corollary B.3.** *In the setting of Corollary B.2, if we take  $\eta_t = \sqrt{\frac{D}{D + \sum_{j < t} |c_j|^\top x_t}}$ , where  $D \geq \max\{1, \sup_{u \in \mathcal{X}} D_{\text{KL}}(u, x_1)\}$  then for any  $z \in \mathcal{X}$ ,*

$$\sum_{t=1}^T (c_t^\top x_t - c_t^\top z) \leq 3\sqrt{D} \sqrt{\sum_{t=1}^T |c_t|^\top x_t + D}.$$

The proofs of the previous two corollaries are in Appendix C.

## C Proofs from Appendix B

*Proof of Corollary B.2.* Each term in the sum of (B.2) may be bounded as follows:

$$\begin{aligned}
\frac{D_{\text{KL}}(x_t, v_t)}{\eta_t} &= \frac{1}{\eta_t} \sum_{i=1}^n \left( x_{t,i} \ln \frac{x_{t,i}}{v_{t,i}} - x_{t,i} + v_{t,i} \right) \\
&= \frac{1}{\eta_t} \sum_{i=1}^n x_{t,i} \left( -\eta_t c_{t,i} - 1 + e^{\eta_t c_{t,i}} \right) \\
&\leq \frac{1}{\eta_t} \sum_{i=1}^n x_{t,i} \left( -\eta_t c_{t,i} - 1 + (1 + \eta_t c_{t,i} + \eta_t^2 c_{t,i}^2) \right) \quad (\text{by Fact A.1}) \\
&= \eta_t \sum_{i=1}^n x_{t,i} c_{t,i}^2 \leq \eta_t \sum_{i=1}^n x_{t,i} |c_{t,i}| = \eta_t |c_t|^\top x_t.
\end{aligned}$$

In the first equality we used that  $\eta_t c_{t,i} \leq 1$  and in the last equality we used that  $c_{t,i} \in [-1, 1]$ .  $\square$

*Proof of Corollary B.3.* Note first that  $\eta_t$  is a decreasing sequence and  $\eta_1 \leq 1$ . By Corollary B.2, we bound

$$\sum_{t=1}^T (c_t^\top x_t - c_t^\top z) \leq \sum_{t=1}^T \eta_t |c_t|^\top x_t + \frac{D}{\eta_{T+1}}. \quad (\text{C.1})$$

Bounding the first term, we have

$$\begin{aligned}
\sum_{t=1}^T \eta_t |c_t|^\top x_t &= \sum_{t=1}^T \sqrt{D} \cdot \frac{|c_t|^\top x_t}{\sqrt{D + \sum_{j<t} |c_j|^\top x_j}} \\
&\leq 2\sqrt{D} \cdot \sqrt{\sum_{t=1}^T |c_t|^\top x_t}, \quad (\text{C.2})
\end{aligned}$$

using Proposition A.6 with  $a_t = |c_t|^\top x_t$  and  $u = D \leq 1$ . Next,

$$\begin{aligned}
\frac{D}{\eta_{T+1}} &= \sqrt{D} \cdot \sqrt{D + \sum_{t=1}^T |c_t|^\top x_t} \\
&\leq D + \sqrt{D} \cdot \sqrt{\sum_{t=1}^T |c_t|^\top x_t}. \quad (\text{C.3})
\end{aligned}$$

Plugging Eq. (C.2) and Eq. (C.3) into Eq. (C.1) gives

$$\sum_{t=1}^T (c_t^\top x_t - c_t^\top z) \leq 3\sqrt{D} \sqrt{\sum_{t=1}^T |c_t|^\top x_t} + D.$$

$\square$

## D Additional Proofs from Section 3

### D.1 Proof of Lemma 3.2

Following [12], we define the function

$$\Psi(s) := e^{s-1} \sum_{t=1}^T G_t(x_t(s)) + \sum_{t=1}^T \ell_t(x_t(s))$$

for  $s \in [0, 1]$  where  $G_t$  is the multilinear extension of  $g_t$ .

We will need the following two lemmas.

**Lemma D.1** (Feldman [12, Lemma 3.2]).

$$\frac{d\Psi(s)}{ds} = e^{s-1} \sum_{t=1}^T G_t(x_t(s)) + \sum_{t=1}^T (e^{s-1} \nabla G_t(x_t(s)) + \ell_t)^\top y_t(s).$$

**Lemma D.2.** For  $s \in [0, 1)$ ,

$$e^{s-1} \sum_{t=1}^T G_t(x_t(s)) + \sum_{t=1}^T (e^{s-1} \nabla G_t(x_t(s)) + \ell_t)^\top y_t(s) \geq e^{s-1} \sum_{t=1}^T g_t(X^*) + \sum_{t=1}^T \ell_t(X^*) - r_s.$$

*Proof.* By the definition of the regret  $r_s$ ,

$$\sum_{t=1}^T (e^{s-1} \nabla G_t(x_t(s)) + \ell_t)^\top \mathbf{1}_{X^*} - \sum_{t=1}^T (e^{s-1} \nabla G_t(x_t(s)) + \ell_t)^\top y_t(s) \leq r_s.$$

Using the properties of the multilinear extension,

$$\begin{aligned} \sum_{t=1}^T [g_t(S^*) - G_t(x_t(s))] &\leq \sum_{t=1}^T [G_t(x_t(s) \vee \mathbf{1}_{S^*}) - G_t(x_t(s))] \\ &\quad (\text{since } g_t(X^*) \leq G_t(x_t(s) \vee \mathbf{1}_{X^*}) \text{ by monotonicity}) \\ &\leq \sum_{t=1}^T \nabla G_t(x_t(s))^\top (x_t(s) \vee \mathbf{1}_{S^*} - x_t(s)) \\ &\quad (\text{since } G_t \text{ is concave along nonnegative directions}) \\ &\leq \sum_{t=1}^T \nabla G_t(x_t(s))^\top \mathbf{1}_{S^*}. \\ &\quad (\text{since } x_t(s) \vee \mathbf{1}_{S^*} - x_t(s) \leq \mathbf{1}_{S^*} \text{ and } \nabla G_t(x_t(s)) \geq 0) \end{aligned}$$

Combining these two inequalities,

$$\begin{aligned} &e^{s-1} \sum_{t=1}^T G_t(x_t(s)) + \sum_{t=1}^T (e^{s-1} \nabla G_t(x_t(s)) + \ell_t)^\top y_t(s) \\ &\geq e^{s-1} \sum_{t=1}^T G_t(x_t(s)) + \sum_{t=1}^T (e^{s-1} \nabla G_t(x_t(s)) + \ell_t)^\top \mathbf{1}_{S^*} - r_s \\ &= e^{s-1} \sum_{t=1}^T [G_t(x_t(s)) - \nabla G_t(x_t(s))^\top \mathbf{1}_{S^*}] + \sum_{t=1}^T \ell_t(S^*) - r_s \\ &\geq e^{s-1} \sum_{t=1}^T g_t(S^*) + \sum_{t=1}^T \ell_t(S^*) - r_s. \end{aligned}$$

□

*Proof of Lemma 3.2.* By Lemma D.1 and Lemma D.2, we have

$$\frac{d\Psi(s)}{ds} \geq e^{s-1} \sum_{t=1}^T g_t(S^*) + \sum_{t=1}^T \ell_t(X^*) - r_s.$$

for  $s \in [0, 1]$ . Integrating this from 0 to 1,

$$\Psi(1) - \Psi(0) \geq (1 - 1/e) \sum_{t=1}^T g_t(S^*) + \sum_{t=1}^T \ell_t(S^*) - R,$$

where  $R := \int_0^1 r_s ds$ . Since  $\Psi(1) - \Psi(0) = \sum_{t=1}^T G_t(x_t) + \sum_{t=1}^T \ell_t(x_t)$ , we obtain

$$(1 - 1/e) \sum_{t=1}^T g_t(S^*) + \sum_{t=1}^T \ell_t(S^*) - \sum_{t=1}^T G_t(x_t) - \sum_{t=1}^T \ell_t(x_t) \leq R.$$

Now the desired approximation ratio follows from

$$\begin{aligned} & (1 - 1/e) \sum_{t=1}^T g_t(S^*) + \sum_{t=1}^T \ell_t(S^*) \\ &= (1 - 1/e) \sum_{t=1}^T f_t(S^*) + 1/e \sum_{t=1}^T \ell_t(S^*) \\ &\geq (1 - 1/e) \sum_{t=1}^T f_t(S^*) + (1 - c)/e \sum_{t=1}^T f_t(S^*) \\ &\geq (1 - c/e) \sum_{t=1}^T f_t(S^*). \end{aligned}$$

Finally, we apply an oblivious rounding to  $x_t$ , we obtain

$$(1 - c/e) \sum_{t=1}^T f_t(S^*) - \mathbf{E} \left[ \sum_{t=1}^T f_t(S_t) \right] \leq R,$$

as desired.  $\square$

## D.2 Proof of Claim 3.4

*Proof.* By Lemma D.1, we have

$$\begin{aligned} & \sum_{t=1}^T (e^{s-1} \nabla G_t(x_t(s)) + \ell_t)^\top y_t(s) \\ &\leq e^{s-1} \sum_{t=1}^T G_t(x_t(s)) + \sum_{t=1}^T (e^{s-1} \nabla G_t(x_t(s)) + \ell_t)^\top y_t(s) \\ &= \frac{d\Psi(s)}{ds}. \end{aligned}$$

Thus,

$$\begin{aligned} \rho &= \int_0^1 \sum_{t=1}^T (e^{s-1} \nabla G_t(x_t(s)) + \ell_t)^\top y_t(s) \\ &\leq \Psi(1) - \Psi(0) \\ &\leq \sum_{t=1}^T (G_t(x_t(1)) + \ell_t(x_t(s))) \\ &= \sum_{t=1}^T F_t(x_t(1)) \\ &\leq T. \end{aligned}$$

$\square$

## D.3 Bregman projection onto the matroid base polytope

In this section, we will denote a matroid by  $\mathcal{M} = (E, \mathcal{I})$  where  $E$  is the groundset and  $\mathcal{I} \subseteq 2^E$  are the independent sets. Algorithm 5 is a specialized form of the algorithm from [17]. Recall that the

generalized KL divergence is defined as

$$D_{\text{KL}}(x, y) = \sum_{e \in E} x_e \ln \frac{x_e}{y_e} - x_e + y_e.$$

We will write  $\Pi_P^{\text{KL}}(y) := \operatorname{argmin}_{x \in P} D_{\text{KL}}(x, y)$  to be the projection of  $y$  onto  $P$  under KL divergence.

---

**Algorithm 5** Bregman Projection onto Matroid Base Polytope

---

**Input:**  $y \in \mathbb{R}_{>0}^E$ , matroid  $\mathcal{M} = (E, \mathcal{I})$

**Output:**  $x^* \in \operatorname{argmin}_{x \in B(\mathcal{M})} D_{\text{KL}}(x, y)$

1: Initialize  $x^{(0)} \leftarrow \frac{y}{n\|y\|_1}$ ,  $N_1 \leftarrow E$ ,  $t \leftarrow 0$ .

2: **while**  $N_t \neq \emptyset$  **do**

3:   Define  $z \in \mathbb{R}^E$  by

$$z_e = \begin{cases} x_e^{(t)} & e \in N_t \\ 0 & e \notin N_t \end{cases}.$$

4:    $\delta_{t+1} \leftarrow \max\{\delta : x^{(t)} + \delta z \in B_{\mathcal{M}}\}$ .

5:    $x^{(t+1)} \leftarrow x^{(t)} + \delta_{t+1} z$ .

6:   Let  $F_{t+1} \subseteq N_t$  be a maximal set such that  $x^{(t+1)}(F_1 \cup \dots \cup F_{t+1}) = \operatorname{rk}(F_1 \cup \dots \cup F_{t+1})$ .

7:    $N_{t+1} \leftarrow N_t \setminus F_{t+1}$ .

8:    $t \leftarrow t + 1$

9: **return**  $x^{(t)}$

---

**Lemma D.3** (Gupta et al. [17, Theorem 3]). *For all  $y \in \mathbb{R}_{>0}^E$ , Algorithm 5 outputs  $\Pi_{B(\mathcal{M})}^{\text{KL}}(y)$ .*

Lemma D.3 is stated in more generality in [17]. To keep this paper as self-contained as possible, we will prove Lemma D.3 in our special case (although the proof itself follows that in [17]). We will require the following lemma which is a consequence of the fact that the greedy algorithm optimizes linear functions over the matroid base polytope.

**Lemma D.4.** *Let  $\mathcal{M} = (E, \mathcal{I})$  be a matroid and let  $B_{\mathcal{M}}$  be the base polytope. Let  $w \in \mathbb{R}^E$ . Consider the (unique) disjoint partitioning of  $E = \cup_{i=1}^k F_i$  satisfying:*

1.  $F_1, \dots, F_k \neq \emptyset$ ;
2. if  $e, e' \in F_i$  then  $w_e = w_{e'}$ ;
3. if  $e_i \in F_i, e_j \in F_j$  and  $i < j$  then  $w_i < w_j$ ; and

Then  $x^* \in \operatorname{argmin}_{w \in B(\mathcal{M})} w^\top x$  if and only if

$$x^*(F_1 \cup \dots \cup F_i) = \operatorname{rk}(F_1 \cup \dots \cup F_i)$$

for every  $i \in [k]$ .

*Proof of Lemma D.3.* Let  $h(x) := \sum_{e \in E} x_e \ln \frac{x_e}{y_e} - x_e + y_e$ . Then  $x^{(t)} \in \operatorname{argmin}_{x \in B(\mathcal{M})} h(x) = D_{\text{KL}}(x, y)$  if and only if  $\nabla h(x^{(t)})^\top (x - x^{(t)}) \geq 0$  for all  $x \in B(\mathcal{M})$ . In other words, we require that  $x^{(t)} \in \operatorname{argmin}_{x \in B(\mathcal{M})} \nabla h(x^{(t)})^\top x$ . In the rest of the proof, we will verify that this inclusion holds for the return point of Algorithm 5.

Suppose that Algorithm 5 terminates after  $t$  iterations. Let  $F_1, \dots, F_t$  be the sets constructed in Algorithm 5. By construction  $F_1, \dots, F_t$  form a disjoint partition of  $E$ . Recall that  $\nabla h(x^{(t)})_e = \ln \frac{x_e^{(t)}}{y_e}$ . By construction, if  $e \in F_i$  then

$$x_e^{(t)} = cy_e(\delta_1 + \dots + \delta_i)$$

where  $c = \frac{1}{n\|y\|_1}$ . Hence,

$$\nabla h(x^{(t)})_e = \ln(c) + \ln(\delta_1 + \dots + \delta_i) \tag{D.1}$$

for  $e \in F_i$ . Note that the RHS of Eq. (D.1) is strictly increasing in  $i$  and by construction,  $x^{(t)}(F_1 \cup \dots \cup F_i) = \text{rk}(F_1 \cup \dots \cup F_i)$  for all  $i \in [t]$ . Lemma D.4 then implies that

$$x^{(t)} \in \underset{x \in B(\mathcal{M})}{\text{argmin}} \nabla(h(x^{(t)}))^\top (x - x^{(t)}),$$

which, as asserted above, implies that  $x^{(t)} \in \underset{x \in B(\mathcal{M})}{\text{argmin}} D_{\text{KL}}(x, y)$ .  $\square$

**Theorem D.5.** *There is a polynomial-time algorithm for computing Bregman projection onto a matroid base polytope.*

*Proof.* Line 4 of Algorithm 5 can be implemented in polynomial-time (see e.g. [15, Theorem 2]). Line 6 can be computed by finding the unique maximal minimizer of the submodular function  $\text{rk}(\cdot) - x^{(t+1)}(\cdot)$  [22, Theorem 3.1]. The correctness of the algorithm follows from Lemma D.3.  $\square$

**Remark D.6.** *It is possible to generalize Theorem D.5 for arbitrary mirror maps and general polymatroids. The details can be found in [17].*

## E Discrete version of Algorithm 1

In this section, we describe a discrete version of Algorithm 1 and formally prove Theorem 3.1.

---

### Algorithm 6 Discrete time algorithm

---

**Input:** accuracy  $\varepsilon > 0$

- 1: Take the largest  $\delta \in (0, \varepsilon/n^2]$  such that  $1/\delta$  is a positive integer.
  - 2: **for**  $s = 0, \delta, 2\delta, \dots, 1 - \delta$  **do**
  - 3:   Initialize online dual averaging algorithms  $\mathcal{A}_s$  over matroid base polytope  $B_{\mathcal{M}}$ .
  - 4: **for**  $t = 1, 2, \dots$  **do**
  - 5:   Set  $x_t(0) = \mathbf{0}$ .
  - 6:   **for**  $s = 0, \delta, 2\delta, \dots, 1 - \delta$  **do**
  - 7:     Set  $x_t(s + \delta) = x_t(s) + \delta \cdot y_t(s)$ , where  $y_t(s) \in P_{\mathcal{M}}$  is the prediction provided by  $\mathcal{A}_s$ .
  - 8:     Apply swap rounding to  $x_t := x_t(1)$  and obtain  $S_t$ .
  - 9:     Play  $S_t$  and observe  $f_t$ .
  - 10:    Compute the modular function  $\ell_t$  for  $f_t$  by (3.1) and let  $g_t = f_t - \ell_t$ .
  - 11:    **for**  $s = 0, \delta, 2\delta, \dots, 1 - \delta$  **do**
  - 12:     Compute an estimator  $\nabla_t(s)$  of  $\nabla G_t(x_t(s))$  by using  $O(n^2 \varepsilon^{-2} \log(\frac{n}{\delta}))$  samples.
  - 13:     Feedback the reward vector  $c_t = -(1 + \delta)^{(s-1)/\delta} \cdot \nabla_t(s) - \ell_t$  to  $\mathcal{A}_s$ .
- 

For the analysis, let us fix  $T > 0$ . Let  $M_t = \max_{i \in V} f_t(i)$ . Using a standard Chernoff bound argument (see Feldman [12, Lemma A.3]) we see that, for all  $t$ ,

$$E_t := n \cdot \max_s \|\nabla_t(s) - \nabla G_t(x_t(s))\|_\infty \leq \varepsilon M_t \quad (\text{E.1})$$

holds with probability at least  $1 - 1/nt^2$ . Following [12], we define  $\Psi(s) = \sum_{t=1}^T [(1 + \delta)^{(s-1)/\delta} G(x_t(s)) + \ell_t^\top x_t(s)]$ . Let us fix  $S^*$  to be an arbitrary optimal solution. We will also write  $M = \sum_{t=1}^T M_t$  and  $E = \sum_{t=1}^T E_t$ .

The first lemma is adapted from the proof of Lemma A.5 in [12] but where we carry around the error terms in Eq. (E.1).

**Lemma E.1** (Feldman [12, Lemma A.5]).

$$\begin{aligned} & \frac{\Psi(s + \delta) - \Psi(s)}{\delta} \\ & \geq \sum_{t=1}^T (1 + \delta)^{(s-1)/\delta} G(x_t(s)) + y_t(s)^\top \left[ (1 + \delta)^{(s-1)/\delta} \nabla_t(s) + \ell_t \right] - \varepsilon M - E. \end{aligned}$$

**Lemma E.2.** For each  $s$ ,

$$\begin{aligned} & \sum_{t=1}^T y_t(s)^\top \left[ (1+\delta)^{(s-1)/\delta} \nabla_t(s) + \ell_t \right] \\ & \geq \sum_{t=1}^T (1+\delta)^{(s-1)/\delta} [g_t(S^*) - G_t(x_t(s))] + \ell_t(S^*) - r_s - E, \end{aligned}$$

where  $r_s$  is the regret of  $\mathcal{A}_s$ .

*Proof.* By the definition of the regret  $r_s$ , we have

$$\begin{aligned} & \sum_{t=1}^T y_t(s)^\top \left[ (1+\delta)^{(s-1)/\delta} \cdot \nabla_t(s) + \ell_t \right] \\ & \geq \sum_{t=1}^T \mathbf{1}_{S^*}^\top \left[ (1+\delta)^{(s-1)/\delta} \cdot \nabla_t(s) + \ell_t \right] - r_s \\ & = \sum_{t=1}^T \left[ (1+\delta)^{(s-1)/\delta} \cdot \mathbf{1}_{S^*}^\top \nabla_t(s) + \ell_t(S^*) \right] - r_s \\ & \geq \sum_{t=1}^T \left[ (1+\delta)^{(s-1)/\delta} \cdot \mathbf{1}_{S^*}^\top \nabla G_t(x_t(s)) - E_t + \ell_t(S^*) \right] - r_s \\ & \geq \sum_{t=1}^T \left[ (1+\delta)^{(s-1)/\delta} \cdot [g_t(S^*) - G_t(x_t(s))] + \ell_t(S^*) \right] - r_s - E, \end{aligned}$$

where we used the similar analysis as in the continuous case in the last inequality.  $\square$

Combining these two lemmas, we have

$$\frac{\Psi(s+\delta) - \Psi(s)}{\delta} \geq \sum_{t=1}^T (1+\delta)^{(s-1)/\delta} g_t(S^*) + \ell_t(S^*) - r_s - \varepsilon M - 2E.$$

for each  $s$ . Summing up this for  $s$ , we obtain

$$\Psi(1) - \Psi(0) \geq \sum_{t=1}^T [C(\delta)g_t(S^*) + \ell_t(S^*)] - \delta \sum_s r_s - \varepsilon M - 2E,$$

where  $C(\delta) := \sum_s \delta(1+\delta)^{(s-1)/\delta} \geq 1 - 1/e - \varepsilon/n$ , provided that  $\delta \leq \varepsilon/n^2$  (see [12, Proof of Lemma A.8]). Since  $g_t(S^*) \leq n \max_{i \in S^*} g_t(i) \leq nM_t$ , we have

$$\Psi(1) - \Psi(0) \geq \sum_{t=1}^T [(1-1/e)g_t(S^*) + \ell_t(S^*)] - \delta \sum_s r_s - 2\varepsilon M - 2E.$$

Thus, following the same argument as in the continuous case, we obtain

$$(1-c/e) \sum_{t=1}^T f_t(S^*) - \sum_{t=1}^T F_t(x_t) - 2\varepsilon M - 2E \leq \delta \sum_s r_s. \quad (\text{E.2})$$

Next, we will need a small claim bounding  $\mathbf{E}[E]$ .

**Claim E.3.**  $\mathbf{E}[E] \leq \varepsilon M + O(1)$ .

*Proof.* For any  $t$ ,  $E_t \leq \varepsilon M_t$  with probability  $1 - 1/nt^2$ . With the remaining  $1/nt^2$  probability, we have a trivial upper bound of  $E_t \leq n$ . Hence,  $\mathbf{E}[E_t] \leq \varepsilon M_t + 1/t^2$ . Summing up over  $t$  gives  $\mathbf{E}[E_t] \leq \varepsilon M + O(1)$ .  $\square$



Hence, taking expectations in Eq. (E.2) and using the property of swap rounding, we have

$$(1 - c/e) \sum_{t=1}^T f_t(S^*) - \sum_{t=1}^T \mathbf{E}[f_t(S_t)] - 4\varepsilon M - O(1) \leq \delta \sum_s r_s.$$

As  $M \leq \sum_{t=1}^T f_t(S^*)$ , we thus have

$$(1 - c/e - 4\varepsilon) \sum_{t=1}^T f_t(S^*) - \sum_{t=1}^T \mathbf{E}[f_t(S_t)] - O(1) \leq \delta \sum_s r_s =: R.$$

It remains to bound  $R$ . To that end, define

$$\rho_s := \sum_{t=1}^T \left[ (1 + \delta)^{(s-1)/\delta} \nabla_t(s) + \ell_t \right]^\top y_t(s),$$

which is the reward received by algorithm  $\mathcal{A}_s$ . As in the continuous case, suppose each  $\mathcal{A}_s$  is an instance of an online dual averaging algorithm (Algorithm 4) with initial point  $y_1(s) = \Pi_{\Phi}^{\text{KL}}(\frac{k}{n} \mathbf{1})$ . Here  $\Phi$  is the negative entropy mirror map. Fact A.4 and Fact A.5 imply that  $\sup_{u \in \mathcal{X}} D_{\text{KL}}(u, x_1) \leq k \ln(n/k)$ . Hence, using Corollary B.3 (applied with  $c_t = -e^{s-1} \nabla G_t(y_t(s)) - \ell_t \in \mathbb{R}_{\leq 0}^n$  and  $D = k \ln(n/k)$ ), we have

$$r_s \leq 3\sqrt{k \ln(n/k)} \sqrt{\rho_s} + k \ln(n/k). \quad (\text{E.3})$$

The following lemma bounds the regret.

**Lemma E.4.** *Using an OLO algorithm that guarantees Eq. (E.3), we have*

$$R \leq O(\sqrt{k \ln(n/k)} \sqrt{T}).$$

Before we prove Lemma E.4, we will need a claim to bound  $\delta \sum_s \rho_s$ .

**Claim E.5.**  $\delta \sum_s \mathbf{E}[\rho_s] \leq O(T)$ .

The proof of Claim E.5 can be found below.

*Proof of Lemma E.4.* If  $T \leq k \ln(n/k)$  then we trivially bound  $r_s \leq T \leq \sqrt{k \ln(n/k)} \sqrt{T}$ . Since  $R = \delta \sum_s r_s$ , we have  $R \leq \sqrt{k \ln(n/k)} \sqrt{T}$  if  $T \leq k \ln(n/k)$ . Henceforth, we assume  $T \geq k \ln(n/k)$ . Summing over  $s = 0, \delta, \dots, 1 - \delta$ , we have

$$\begin{aligned} R &= \delta \sum_s r_s \leq 3\sqrt{k \ln(n/k)} \sum_s \delta \sqrt{\rho_s} + k \ln(n/k) \\ &\leq 3\sqrt{k \ln(n/k)} \sqrt{\sum_s \delta \rho_s} + k \ln(n/k) \quad (\text{Jensen's Inequality}). \end{aligned}$$

Taking expectations and applying Jensen's Inequality, we get that

$$\begin{aligned} \mathbf{E}[R] &\leq 3\sqrt{k \ln(n/k)} \mathbf{E} \left[ \sqrt{\sum_s \delta \rho_s} \right] + k \ln(n/k) \\ &\leq 3\sqrt{k \ln(n/k)} \sqrt{\sum_s \delta \mathbf{E}[\rho_s]} + k \ln(n/k) \\ &\leq O(\sqrt{k \ln(n/k)} \sqrt{T}), \end{aligned}$$

where in the last inequality we used Claim E.5 and our assumption that  $T \geq k \ln(n/k)$ .  $\square$

*Proof of Claim E.5.* By Lemma E.1, we have  $\delta \rho_s \leq \Psi(s + \delta) - \Psi(s) + \delta \varepsilon M + \delta E$ . Summing over all  $s = 0, \delta, \dots, 1 - \delta$  gives

$$\begin{aligned} \delta \sum_s \rho_s &\leq \Psi(1) - \Psi(0) + \varepsilon M + E \\ &\leq \sum_{t=1}^T [G(x_t(1)) + \ell_t^\top x_t(1)] + \varepsilon M + E \\ &\leq T + \varepsilon M + E. \end{aligned}$$

Note that  $M \leq T$ . Taking expectations and applying Claim E.3 to bound  $\mathbf{E}[E]$  gives  $\delta \sum_s \mathbf{E}[\rho_s] \leq (1 + 2\varepsilon)T + O(1) \leq O(T)$ .  $\square$

## F Additional Proofs from Section 4

### F.1 Proof of Theorem 4.1

If  $T \leq n$  then we have a trivial regret bound of  $T \leq \sqrt{nT}$ . Henceforth, we assume that  $T \geq n$ . Recall that  $r_i(T) = \max \left\{ \sum_{t=1}^T p_{t,i}^- \Delta_{t,i}^+, \sum_{t=1}^T p_{t,i}^+ \Delta_{t,i}^- \right\} - \frac{1}{2} \sum_{t=1}^T (p_{t,i}^+ \Delta_{t,i}^+ + p_{t,i}^- \Delta_{t,i}^-)$ . Let  $g_i = \max \left\{ \sum_{t=1}^T p_{t,i}^- |\Delta_{t,i}^+|, \sum_{t=1}^T p_{t,i}^+ |\Delta_{t,i}^-| \right\}$ . By Lemma 4.8 and Lemma 4.4,

$$r_i(T) \leq O \left( \sqrt{g_i} + \sqrt{\sum_{t \in C_i^+ \cap [T]} \alpha_{t,i}} + \sqrt{\sum_{t \in C_i^- \cap [T]} \beta_{t,i}} + 1 \right) \quad (\text{F.1})$$

where  $C_i^+, C_i^-, \alpha_{t,i}, \beta_{t,i}$  are as defined in Lemma 4.4. The following two lemmas bound each of the terms in Eq. (F.1). We relegate the proofs to Appendix F.4.

**Lemma F.1.** *The following two bounds hold:*

1.  $\mathbf{E}[\sum_{i=1}^n \sqrt{\sum_{t \in C_i^+ \cap [T]} \alpha_{t,i}}] \leq O(\sqrt{nT})$ ; and
2.  $\mathbf{E}[\sum_{i=1}^n \sqrt{\sum_{t \in C_i^- \cap [T]} \beta_{t,i}}] \leq O(\sqrt{nT})$ .

**Lemma F.2.**  $\sum_{i=1}^n \mathbf{E} \sqrt{g_i} \leq O(\sqrt{nT})$ .

*Proof of Theorem 4.1.* By Lemma 4.3, it suffices to bound  $\sum_{i=1}^n \mathbf{E}[r_i(T)]$ . Using Eq. (F.1), Lemma F.1, and Lemma F.2, we have  $\sum_{i=1}^n \mathbf{E}[r_i(T)] \leq O(\sqrt{nT}) + O(n) \leq O(\sqrt{nT})$ , where the last inequality is because  $n \leq \sqrt{nT}$ .  $\square$

### F.2 Details of halfspace oracles for the Blackwell instances in Section 4

We describe how to construct an efficient halfspace oracle for the Blackwell instances corresponding to USM balance subproblems in Section 4 via strong duality of LP. We use the same notation from Section 4. Let us assume that a halfspace  $H$  is given by a linear inequality  $a^\top z \leq \beta$  for some  $a \in \mathbb{R}^2$  and  $\beta \in \mathbb{R}$ . Since  $H$  contains  $\mathbb{R}_{\leq 0}^2$ , one can assume  $\beta = 0$  without loss of generality. Then,  $p \in \mathcal{X}$  is a valid output of an half-space oracle if  $\max_{\Delta \in \mathcal{Y}} a^\top u(p, \Delta) \leq 0$ . Therefore, to find such  $p$ , it suffices to solve the min-max linear programming

$$\min_{p \in \mathcal{X}} \max_{\Delta \in \mathcal{Y}} a^\top u(p, \Delta).$$

Now, replacing the inner maximization with the dual problem, we have an equivalent LP

$$\begin{aligned} \min_{p, z} \quad & z_1 + z_2 - z_3 - z_4 \\ \text{subject to} \quad & p \in \mathcal{X} \\ & -z_0 + z_1 - z_3 = a^+ \cdot p^- - p^+ \\ & -z_0 + z_2 - z_4 = a^- \cdot p^+ - p^- \\ & z_0, z_1, z_2, z_3, z_4 \geq 0, \end{aligned} \quad (\text{F.2})$$

where we used  $a^\top u(p, \Delta) = (a^+ \cdot p^- - p^+, a^- \cdot p^+ - p^-)^\top \Delta$ . Since it is a constant dimensional problem, one can solve it in  $O(1)$  time.

### F.3 Proof of Claim 4.9 and Lemma 4.10

*Proof of Claim 4.9.* If  $x \in B_2(1) \cap \mathbb{R}_{\geq 0}$  then

$$\begin{aligned} D_{\text{KL}}(x, x_1) &= x^+ \ln(\sqrt{2}x^+) + x^- \ln(\sqrt{2}x^-) - \|x\|_1 + \sqrt{2} \\ &\leq x^+ \ln(x^+) + x^- \ln(x^-) + \sqrt{2} \ln(\sqrt{2}) + \sqrt{2} \\ &\leq \sqrt{2} \ln(\sqrt{2}) + \sqrt{2} \leq 2. \end{aligned}$$

The second last inequality is because  $x^+, x^- \in [0, 1]$  so  $\ln(x^+), \ln(x^-) \leq 0$ .  $\square$

*Proof of Lemma 4.10.* First, we use the trivial upper bound  $|c_t|^\top x_t \leq |c_t^+| + |c_t^-|$ . We now bound  $|c_t^+|$  and  $|c_t^-|$  separately. Suppose first that  $t \in C^+$ . In this case  $|c_t^+| = c_t^+$ . Using the bound  $-\Delta_t^- \leq \Delta_t^+$ , we have

$$c_t^+ \leq \frac{1}{2}(p_t^+ \cdot \Delta_t^+ + p_t^- \cdot \Delta_t^-) + p_t^+ \cdot \Delta_t^+.$$

On the other hand, if  $t \notin C^+$  then  $|c_t^+| = -c_t^+$ . Using that  $-\Delta_t^+ \leq \Delta_t^-$  and  $-\Delta_t^- \leq \Delta_t^+$ , we have

$$-c_t^+ \leq p_t^+ \Delta_t^- + \frac{1}{2}(p_t^+ \Delta_t^- + p_t^- \Delta_t^+) \leq \frac{3}{2}p_t^+ |\Delta_t^-| + \frac{1}{2}p_t^- |\Delta_t^+|.$$

Hence,

$$\begin{aligned} |c_t^+| &\leq \left( \frac{3}{2}p_t^+ \cdot \Delta_t^+ + \frac{1}{2}p_t^- \cdot \Delta_t^- \right) \mathbf{1}[t \in C^+] + \left( \frac{3}{2}p_t^+ |\Delta_t^-| + \frac{1}{2}p_t^- |\Delta_t^+| \right) \mathbf{1}[t \notin C^+] \\ &\leq \left( \frac{3}{2}p_t^+ \cdot \Delta_t^+ + \frac{1}{2}p_t^- \cdot \Delta_t^- \right) \mathbf{1}[t \in C^+] + \left( \frac{3}{2}p_t^+ |\Delta_t^-| + \frac{1}{2}p_t^- |\Delta_t^+| \right). \end{aligned}$$

With nearly identical reasoning, we have

$$|c_t^-| \leq \left( \frac{1}{2}p_t^+ \cdot \Delta_t^+ + \frac{3}{2}p_t^- \cdot \Delta_t^- \right) \mathbf{1}[t \in C^-] + \left( \frac{1}{2}p_t^+ |\Delta_t^-| + \frac{3}{2}p_t^- |\Delta_t^+| \right).$$

We conclude that

$$\begin{aligned} |c_t^+| + |c_t^-| &\leq \left( \frac{3}{2}p_t^+ \cdot \Delta_t^+ + \frac{1}{2}p_t^- \cdot \Delta_t^- \right) \mathbf{1}[t \in C^+] + \left( \frac{1}{2}p_t^+ \cdot \Delta_t^+ + \frac{3}{2}p_t^- \cdot \Delta_t^- \right) \mathbf{1}[t \in C^-] \\ &\quad + 2(p_t^+ |\Delta_t^-| + p_t^- |\Delta_t^+|). \end{aligned}$$

Summing up the right hand side of the bound gives the claim.  $\square$

### F.4 Proof of Lemma F.1 and Lemma F.2

In this section, we let  $\mathcal{F}_{t,i}$  denote the  $\sigma$ -algebra containing all randomness up to the  $i$ th iteration at time  $t$ .<sup>7</sup>

*Proof of Lemma F.1.* We prove only the first inequality. The second inequality is nearly identical. Now,

$$\begin{aligned} \mathbf{E} \left[ \sum_{i=1}^n \sqrt{\sum_{t \in C_i^+ \cap [T]} \alpha_{t,i}} \right] &\leq \sqrt{n} \sqrt{\mathbf{E} \left[ \sum_{i=1}^n \sum_{t \in C_i^+ \cap [T]} \alpha_{t,i} \right]} \quad (\text{Cauchy-Schwarz}) \\ &= \sqrt{n} \sqrt{\mathbf{E} \left[ \sum_{i=1}^n \sum_{t \in C_i^+ \cap [T]} \left( \frac{3}{2}p_t^+ \Delta_t^+ + \frac{1}{2}p_t^- \Delta_t^- \right) \right]} \end{aligned}$$

As asserted in Lemma 4.4, the event  $t \in C_i^+$  depends only on  $p_{t,i}, \Delta_{t,i}$  both of which are  $\mathcal{F}_{t,i-1}$ -measurable. Hence, applying Claim F.3 gives  $\mathbf{E} \left[ \sum_{i=1}^n \sqrt{\sum_{t \in C_i^+ \cap [T]} \alpha_{t,i}} \right] \leq 2\sqrt{nT}$ .  $\square$

<sup>7</sup>Without loss of generality, we assume  $f_1, f_2, \dots$  are deterministic (but unknown to the algorithm). If  $f_1, f_2, \dots$  are random then we can condition on  $f_1, \dots, f_t$  for the argument.

**Claim F.3.** Let  $S_t \subseteq [n]$  be a random set such that the event  $\{i \in S_t\}$  can be determined by knowing  $\Delta_{t,i}$  and  $p_{t,i}$ . Then  $\mathbf{E}[\sum_{i \in S_t} p_{t,i}^+ \Delta_{t,i}^+] \leq 1$  and  $\mathbf{E}[\sum_{i \in S_t} p_{t,i}^- \Delta_{t,i}^-] \leq 1$ .

*Proof.* We prove only the first inequality as the second inequality is similar. Recall that  $\mathcal{F}_{t,i}$  is the  $\sigma$ -algebra generated by all randomness up iteration  $i$  of the algorithm at time  $t$ . Then  $\Delta_{t,i}$  and  $p_{t,i}$  are  $\mathcal{F}_{t,i-1}$ -measurable so  $\{i \in S_t\}$  is  $\mathcal{F}_{t,i-1}$ -measurable. Thus

$$\begin{aligned} \mathbf{E}[\sum_{i \in S_t} p_{t,i}^+ \Delta_{t,i}^+] &= \mathbf{E}[\sum_{i=1}^n p_{t,i}^+ \Delta_{t,i}^+ \mathbf{1}[i \in S_t]] \\ &= \mathbf{E}[\sum_{i=1}^n \mathbf{E}[f_t(X_{t,i}) - f_t(X_{t,i-1}) \mid \mathcal{F}_{t,i-1}] \mathbf{1}[i \in S_t]] \\ &= \mathbf{E}[\mathbf{E}[\sum_{i=1}^n (f_t(X_{t,i}) - f_t(X_{t,i-1})) \mathbf{1}[i \in S_t]]] \quad (\mathbf{1}[i \in S_t] \text{ is } \mathcal{F}_{t,i-1}\text{-measurable}) \\ &= \mathbf{E}[\sum_{i \in S_t} f_t(X_{t,i}) - f_t(X_{t,i-1})] \\ &\leq 1, \end{aligned}$$

where the last inequality is by Claim A.3.  $\square$

We now turn to the proof of Lemma F.2. Define  $N_i^+ := \{t \in [T] : \Delta_{t,i}^+ < 0\}$  and  $N_i^- := \{t \in [T] : \Delta_{t,i}^- < 0\}$ . Recall that

$$g_i = \max \left\{ \sum_{t=1}^T p_{t,i}^- |\Delta_{t,i}^+|, \sum_{t=1}^T p_{t,i}^+ |\Delta_{t,i}^-| \right\}.$$

The following simple claim will prove to be useful.

**Claim F.4.**

$$\max \left\{ \sum_{t=1}^T p_{t,i}^- \Delta_{t,i}^+, \sum_{t=1}^T p_{t,i}^+ \Delta_{t,i}^- \right\} \geq g_i - \sum_{t \in N_i^+} 2p_{t,i}^- \cdot \Delta_{t,i}^- - \sum_{t \in N_i^-} 2p_{t,i}^+ \cdot \Delta_{t,i}^+. \quad (\text{F.3})$$

The proof of Claim F.4 is straightforward manipulations and can be found below.

*Proof of Lemma F.2.* Recalling the definition of  $r_i(T)$  (from Eq. (4.1)) and applying Lemma 4.8 we have

$$\max \left\{ \sum_{t=1}^T p_{t,i}^- \Delta_{t,i}^+, \sum_{t=1}^T p_{t,i}^+ \Delta_{t,i}^- \right\} - \frac{1}{2} \sum_{t=1}^T (p_{t,i}^+ \Delta_{t,i}^+ - p_{t,i}^- \Delta_{t,i}^-) \leq \text{Reg}_{\mathcal{A}_i}(T). \quad (\text{F.4})$$

Using Claim F.4 and Claim F.3 to lower bound the left-hand side of Eq. (F.4) gives

$$\sum_{i=1}^n \mathbf{E}[g_i] - C \cdot T \leq \sum_{i=1}^n \mathbf{E}[\text{Reg}_{\mathcal{A}_i}(T)],$$

for some constant  $C > 0$ . Hence, using Lemma 4.4 to bound  $\text{Reg}_{\mathcal{A}_i}(T)$  and applying Claim F.3 and Lemma F.1, we have, for some (different) constant  $C > 0$ ,

$$\sum_{i=1}^n \mathbf{E}[g_i] - C \cdot T \leq C \sum_{i=1}^n \sqrt{\mathbf{E}[g_i]} \leq C \sqrt{n} \sqrt{\sum_{i=1}^n \mathbf{E}[g_i]},$$

where the second inequality is by Jensen's Inequality and the last inequality is by Cauchy-Schwarz. Let  $G = \sqrt{\sum_{i=1}^n \mathbf{E}[g_i]}$ . The bound becomes  $G^2 - CT \leq C\sqrt{n}G$ . By Claim A.2,

$$G \leq \frac{C\sqrt{T} + \sqrt{C^2 n}}{2} \leq O(\sqrt{T}),$$

where the last inequality is because  $n \leq T$ . Finally, we have

$$\sum_{i=1}^n \mathbf{E}[\sqrt{g_i}] \leq \sqrt{n} \sqrt{\sum_{i=1}^n \mathbf{E}[g_i]} = \sqrt{n}G \leq O(\sqrt{nT}),$$

which completes the proof of the lemma.  $\square$

*Proof of Claim F.4.* Note that

$$\sum_{t=1}^T p_{t,i}^- \cdot \Delta_{t,i}^+ - \sum_{t \in N_i^+} 2p_{t,i}^- \cdot \Delta_{t,i}^+ = \sum_{t=1}^T p_{t,i}^- \cdot |\Delta_{t,i}^+|.$$

Hence,

$$\begin{aligned} \sum_{t=1}^T p_{t,i}^- \cdot \Delta_{t,i}^+ &= \sum_{t=1}^T p_{t,i}^- \cdot |\Delta_{t,i}^+| + \sum_{t \in N_i^+} 2p_{t,i}^- \cdot \Delta_{t,i}^+ \\ &\geq \sum_{t=1}^T p_{t,i}^- \cdot |\Delta_{t,i}^+| - 2 \sum_{t \in N_i^+} p_{t,i}^- \cdot \Delta_{t,i}^- \end{aligned}$$

where in the last inequality, we used the fact that  $\Delta_{t,i}^+ + \Delta_{t,i}^- \geq 0$ , which implies that  $\Delta_{t,i}^+ \geq -\Delta_{t,i}^-$ . Similarly, we have

$$\begin{aligned} \sum_{t=1}^T p_{t,i}^+ \cdot \Delta_{t,i}^- &= \sum_{t=1}^T p_{t,i}^+ \cdot |\Delta_{t,i}^-| + \sum_{t \in N_i^+} 2p_{t,i}^+ \cdot \Delta_{t,i}^- \\ &\geq \sum_{t=1}^T p_{t,i}^+ \cdot |\Delta_{t,i}^-| - \sum_{t \in N_i^-} 2p_{t,i}^+ \cdot \Delta_{t,i}^+ \end{aligned}$$

Hence,

$$\begin{aligned} \max \left\{ \sum_{t=1}^T p_{t,i}^- \Delta_{t,i}^+, \sum_{t=1}^T p_{t,i}^+ \Delta_{t,i}^- \right\} &\geq \\ \max \left\{ \sum_{t=1}^T p_{t,i}^- \cdot |\Delta_{t,i}^+| - \sum_{t \in N_i^+} 2p_{t,i}^- \cdot \Delta_{t,i}^-, \sum_{t=1}^T p_{t,i}^+ \cdot |\Delta_{t,i}^-| - \sum_{t \in N_i^-} 2p_{t,i}^+ \cdot \Delta_{t,i}^+ \right\}. \end{aligned}$$

Finally, to get the desired inequality, we use the simple fact that  $\max\{\alpha_1 - \beta_1, \alpha_2 - \beta_2\} \geq \max\{\alpha_1, \alpha_2\} - \beta_1 - \beta_2$  whenever  $\beta_1, \beta_2 \geq 0$ .  $\square$
